# Supplementary material for: Alcohol-Associated Liver Disease Mortality Rates by Race Before and During the COVID-19 Pandemic in the US
Source: PubMed Central journal article supplement (PMC10122166; doi:10.1001/jamahealthforum.2023.0527), 2023-04-21
Supplement: jamahealthforum-e230527-s001.pdf [file jamahealthforum-e230527-s001.pdf]

## Data Sharing Statement

Kulkarni. Alcohol-Associated Liver Disease Mortality Rates by Race Before and During the COVID-19 Pandemic in the US. *JAMA Health Forum*. Published April 21, 2023.  
doi:10.1001/jamahealthforum.2023.0527

### Data

**Data available:** Yes

**Data types:** Other (please specify)

**Additional Information:** Publicly available data

**How to access data:** <https://wonder.cdc.gov/controller/datarequest/D77>

**When available:** With publication

### Supporting Documents

**Document types:** None

### Additional Information

**Who can access the data:** Everyone (publicly available data)

**Types of analyses:** Any analyses

**Mechanisms of data availability:** NA
